# Supplementary material for: Drozitumab, a Human Antibody to Death Receptor 5, Has Potent Antitumor Activity against Rhabdomyosarcoma with the Expression of Caspase-8 Predictive of Response
Source: Oxford University Press journal article supplement (doi:10.1158/1078-0432.ccr-10-2874), 2011-03-08
Supplement: 10780432ccr102874-sup-supplementary_table_s1.xlsx [file 10780432ccr102874-sup-supplementary_table_s1.xlsx]

## Sheet: S Table 1
IHC	Age	Sex	Diagnosis		Caspase-8 Weight Index	DR5 Weight Index Cytoplasmic Staining
1	33	F	Pleomorphic rhabdomyosarcoma of right thigh	Malignant	135	237.5
2	21	M	Embryonic rhabdomyosarcoma of retroperitoneum	Malignant	0	0
3	51	F	Embryonic rhabdomyosarcoma of cervix	Malignant	120	232.5
4	16	M	Embryonic rhabdomyosarcoma of left testis	Malignant	0	0
5	49	F	Embryonic rhabdomyosarcoma of uterus	Malignant	135	285
6	30	M	Embryonic rhabdomyosarcoma of left leg	Malignant	25	15
7	18	M	Embryonic rhabdomyosarcoma of tongue	Malignant	0	85
8	91	M	Pleomorphic rhabdomyosarcoma of right thigh	Malignant	215	277.5
9	74	F	Spindle cell rhabdomyosarcoma of bladder (ERMS)	Malignant	100	250
10	67	F	Embryonic rhabdomyosarcoma of uterus	Malignant	150	285
11	40	F	Embryonic rhabdomyosarcoma of abdominal cavity	Malignant	5	87.5
12	23	F	Embryonic rhabdomyosarcoma of abdominal cavity	Malignant	25	137.5
13	50	M	Pleomorphic rhabdomyosarcoma of right thigh	Malignant	190	255
14	10	M	Embryonic rhabdomyosarcoma of left leg	Malignant	15	122.5
15	32	F	Embryonic rhabdomyosarcoma of uterus	Malignant	135	292.5
16	48	M	Alveolar rhabdomyosarcoma of right leg	Malignant	195	285
17	40	M	Alveolar rhabdomyosarcoma of back	Malignant	85	245
18	49	M	Embryonic rhabdomyosarcoma of left testis	Malignant	60	170
Blots	Age	Sex	Diagnosis		Caspase-8	DR5
P1	20	M	Embryonic rhabdomyosarcoma	Malignant	Pos	Pos
P2	NA	NA	Rhabdomyosarcoma (subtype unknown)	NA	Pos	Pos
P3	2	F	Embryonic rhabdomyosarcoma	Malignant	Pos	Pos
P4	NA	NA	Alveolar rhabdomyosarcoma	Malignant	Pos	Pos
P5	17	F	Alveolar rhabdomyosarcoma	Malignant	Pos	Pos
P6	13	M	Alveolar rhabdomyosarcoma	Malignant	Neg	Neg
P7	NA	NA	Rhabdomyosarcoma (subtype unknown)	NA	Pos	Pos
P8	20	F	Alveolar rhabdomyosarcoma	Malignant	Pos	Pos
			Supplemental Table 1
